# Supplementary material
Source: PubMed Central journal article supplement (PMC7706877)
Supplement: ry200240suppa1.pdf [file ry200240suppa1.pdf]

**Table E1. Sensitivity and specificity of SM/DBT versus DM/DBT screens.**

|          | Sensitivity                    |                        |                       | Specificity                          |                        |                       |
|----------|--------------------------------|------------------------|-----------------------|--------------------------------------|------------------------|-----------------------|
|          | % (ratio) (95% CI)             | Unadjusted OR (95% CI) | Adjusted* OR (95% CI) | % (ratio) (95% CI)                   | Unadjusted OR (95% CI) | Adjusted* OR (95% CI) |
| Combined |                                |                        |                       |                                      |                        |                       |
| DM/DBT   | 87.7% (499/569)<br>(85–90.4)   | Ref                    | Ref                   | 92.6% (78,442/84,685)<br>(92.5–92.8) | Ref                    | Ref                   |
| SM/DBT   | 88.3% (368/417)<br>(85.2–91.3) | 1.05 (0.71–1.56)       | 1.27 (0.79–2.06)      | 93.5% (61,430/65,692)<br>(93.3–93.7) | 1.15 (1.10–1.19)       | 0.95 (0.90–0.99)      |
| Center 1 |                                |                        |                       |                                      |                        |                       |
| DM/DBT   | 91.5% (205/224)<br>(87.9–95.2) | Ref                    | Ref                   | 91.6% (31,047/33,882)<br>(91.3–91.9) | Ref                    | Ref                   |
| SM/DBT   | 87.7% (192/219)<br>(83.3–92)   | 0.66 (0.36–1.22)       | 1.10 (0.48–2.53)      | 93.6% (31,769/33,961)<br>(93.3–93.8) | 1.32 (1.25–1.40)       | 1.04 (0.96–1.11)      |
| Center 2 |                                |                        |                       |                                      |                        |                       |
| DM/DBT   | 85.2% (294/345)<br>(81.5–89)   | Ref                    | Ref                   | 93.3% (47,395/50,803)<br>(93.1–93.5) | Ref                    | Ref                   |
| SM/DBT   | 88.9% (176/198)<br>(84.5–93.3) | 1.39 (0.81–2.37)       | 1.61 (0.82–3.19)      | 93.5% (29,661/31,731)<br>(93.2–93.7) | 1.03 (0.97–1.09)       | 0.84 (0.79–0.90)      |

\* Adjusted for age, race, BMI, breast density, first degree family history, baseline versus subsequent, DBT round, and practice ID.

There was no statistically significant interaction between institution (University of Pennsylvania/University of Vermont) and screen type in the adjusted models for sensitivity ( $P = .08$ ), but there was a statistically significant interaction for specificity ( $P < .01$ ). OR: odds ratio, CI: confidence interval, DM: Digital Mammography, SM: Synthesized Mammography, DBT: Digital Breast Tomosynthesis, Center 1: University of Pennsylvania, Center 2: University of Vermont.
